# Supplementary material
Source: Springer Nature journal article supplement (https://www.springermedizin.de/resource/supplementary/12955_2008_500_MOESM4_ESM.pdf/9560594)

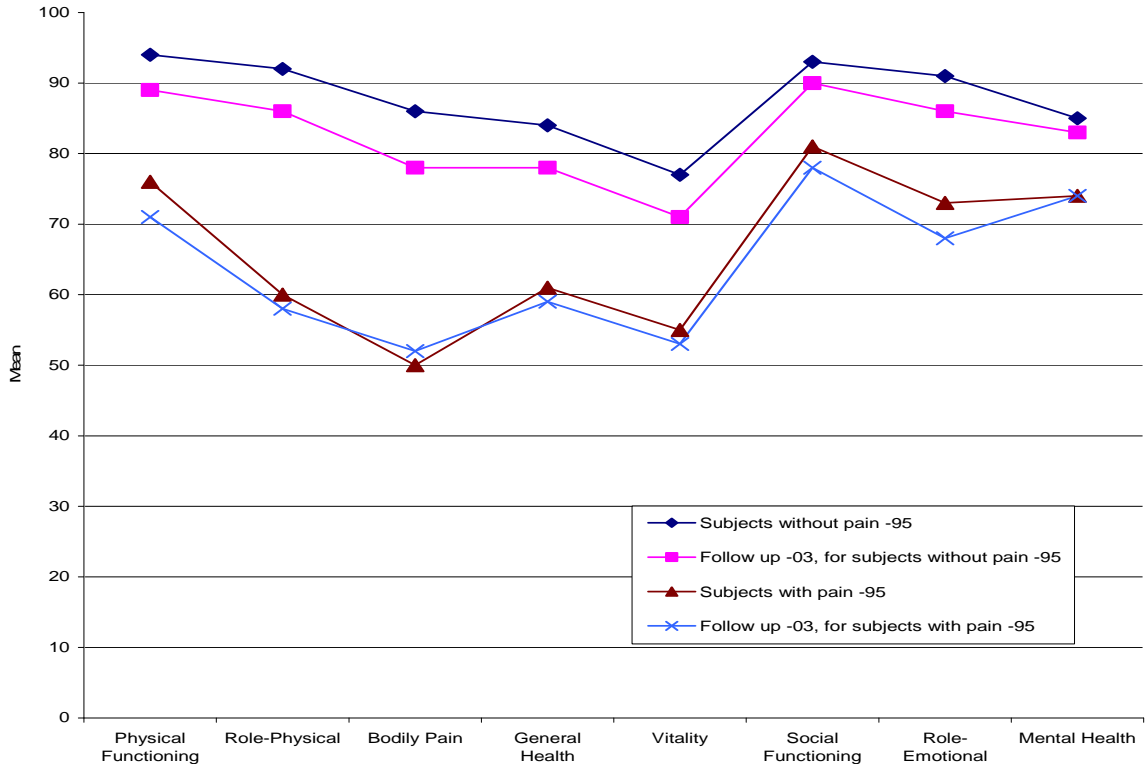

Supplement: MOESM4 [file 9560594]
